# Supplementary material for: Expressional Subpopulation of Cancers Determined by G64, a Co-regulated Module
Source: PubMed Central journal article supplement — Genomics Inform. 2015 Dec 31;13(4):132–6. doi: 10.5808/GI.2015.13.4.132 (PMC4742323; doi:10.5808/gi.2015.13.4.132), 2015-12-31
Supplement: gni-13-132-s002.pdf [file gni-13-132-s002.pdf]

## **SUPPLEMENTARY INFORMATION**

### **Expressional Subpopulation of Cancers Determined by G64, a Co-regulated Module**

**Jae-Woong Min, Sun Shim Choi\***

Department of Medical Biotechnology, College of Biomedical Science, and Institute of Bioscience & Biotechnology, Chuncheon 24341, Korea

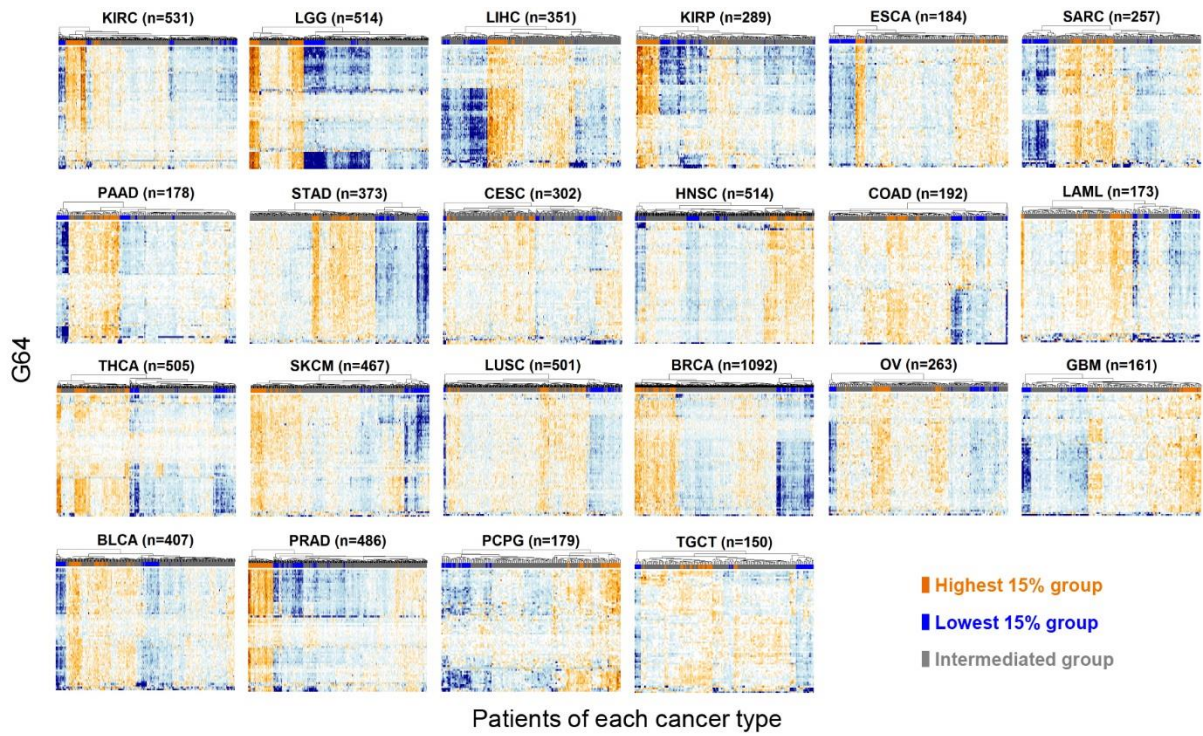

**Supplementary Fig. 1.** Heat map analysis of the G64 expression in the 22 cancers.
